# Supplementary material for: Anti-Streptococcus mutans and anti-biofilm activities of dextranase and its encapsulation in alginate beads for application in toothpaste
Source: PeerJ journal article supplement (doi:10.7717/peerj.10165), 2020-11-17
Supplement: Dataset_S1.zip [file Dataset_S1.zip]

## Sheet: %EE
𝐓𝐡𝐞 𝐚𝐦𝐨𝐮𝐧𝐭 𝐨𝐟 𝐩𝐫𝐨𝐭𝐞𝐢𝐧 𝐟𝐫𝐨𝐦 𝐞𝐧𝐜𝐚𝐩𝐬𝐮𝐥𝐚𝐭𝐢𝐨𝐧 (Before Encap)										𝐏𝐫𝐨𝐭𝐞𝐢𝐧 𝐜𝐨𝐧𝐭𝐞𝐧𝐭 𝐢𝐧 𝐜𝐚𝐥𝐜𝐢𝐮𝐦 𝐜𝐡𝐥𝐨𝐫𝐢𝐝𝐞 𝐬𝐨𝐥𝐮𝐭𝐢𝐨𝐧 (After Encap)
The conditions	Alginate + Dextranase									CaCl2
Run	1	2	3	Avg	SD	Blank	Avg-blank			Run	1	2	3	Avg	SD	Blank	Avg-blank
4	0.894	0.828	0.8043	0.8421	0.0464826	0.421533	0.420567			4	0.871	0.829	0.81	0.836667	0.0312143	0.1829	0.653767
12	0.6803	0.658	0.632	0.656767	0.0241736	0.405267	0.2515			12	0.538476	0.537993	0.56373	0.546733	0.0147217	0.177067	0.369666
3	0.78	0.77	0.7584	0.769467	0.0108099	0.421533	0.347933			3	0.734633	0.785967	0.749633	0.756744	0.0263951	0.179933	0.576811
5	0.7391	0.713	0.73	0.727367	0.0132478	0.405267	0.3221			5	0.9759	0.9782	0.996667	0.983589	0.0113839	0.177067	0.806522
1	0.680067	0.6806	0.680067	0.680244	0.00030792	0.399833	0.280411			1	0.891233	0.8398	0.890133	0.873722	0.0293827	0.179933	0.693789
11	0.617	0.691667	0.6983	0.668989	0.0451457	0.405267	0.263722			11	0.798767	0.732867	0.790633	0.774089	0.0359304	0.1829	0.591189
2	0.59033	0.61	0.61	0.603443	0.0113565	0.399833	0.20361			2	0.5701	0.570133	0.574033	0.571422	0.00226135	0.179933	0.391489
9	0.884433	0.8965	0.996333	0.925756	0.0614192	0.399833	0.525922			9	0.802933	0.787233	0.764033	0.784733	0.0195701	0.1829	0.601833
10	0.7236	0.67185	0.6752	0.690217	0.0289593	0.421533	0.268683			10	0.877433	0.8282	0.834433	0.846689	0.0268073	0.177067	0.669622
8	0.88	0.84	0.8754	0.865133	0.0218873	0.405267	0.459867			8	0.400267	0.400233	0.406233	0.402244	0.00345452	0.1829	0.219344
7	0.693	0.6705	0.6674	0.676967	0.0139715	0.421533	0.255433			7	0.6734	0.764433	0.8252	0.754344	0.0764012	0.179933	0.574411
6	0.620833	0.621867	0.621733	0.621478	0.000562073	0.399833	0.221644			6	0.537577	0.540733	0.5416	0.53997	0.0021175	0.177067	0.362903
𝐓𝐡𝐞 𝐚𝐦𝐨𝐮𝐧𝐭 𝐨𝐟 𝐩𝐫𝐨𝐭𝐞𝐢𝐧 𝐟𝐫𝐨𝐦 𝐞𝐧𝐜𝐚𝐩𝐬𝐮𝐥𝐚𝐭𝐢𝐨𝐧											𝐏𝐫𝐨𝐭𝐞𝐢𝐧 𝐜𝐨𝐧𝐭𝐞𝐧𝐭 𝐢𝐧 𝐜𝐚𝐥𝐜𝐢𝐮𝐦 𝐜𝐡𝐥𝐨𝐫𝐢𝐝𝐞 𝐬𝐨𝐥𝐮𝐭𝐢𝐨𝐧
	y = 0.0023x + 0.054											y = 0.0023x + 0.054							%EE
Run	y=mx+c (ug/ml)	220 ul (sample+reagent) ; ug	ug/real weight	mg/real weight							Run	y=mx+c (ug/ml)	220 ul (sample+reagent) ; ug	ug/real weight	mg/real weight			Run	The results obtained from studies
4	159.377	35.0629	138221	138.221							4	260.768	57.369	55261.2	55.2612			4	60.0196
12	85.8696	18.8913	87790.9	87.7909							12	137.246	30.1942	30592.1	30.5921			12	65.1534
3	127.797	28.1154	85224.9	85.2249							3	227.309	50.008	54353	54.353			3	36.2241
5	116.565	25.6443	106864	106.864							5	327.184	71.9804	85331.6	85.3316			5	20.1495
1	98.4396	21.6567	85017.2	85.0172							1	278.169	61.1972	70870.6	70.8706			1	16.6396
11	91.1836	20.0604	73491.8	73.4918							11	233.56	51.3833	63953.1	63.9531			11	12.9793
2	65.0478	14.3105	46447.6	46.4476							2	146.734	32.2815	40405.4	40.4054			2	13.0087
9	205.184	45.1404	182619	182.619							9	238.188	52.4014	54530.3	54.5303			9	70.1399
10	93.3406	20.5349	73251.2	73.2512							10	267.662	58.8856	69369.4	69.3694			10	5.29925
8	176.464	38.822	135317	135.317							8	71.8889	15.8156	15659.7	15.6597			8	88.4274
7	87.5797	19.2675	72961.6	72.9616							7	226.266	49.7785	47326.3	47.3263			7	35.1353
6	72.8889	16.0356	52543.8	52.5438							6	134.306	29.5473	41957.1	41.9571			6	20.1482
The amount of protein from encapsulation											Protein content in calcium chloride solution
Alginate solution + Dextranase solution (sample) = 20 uL in reaction (Before encapsulation)					Actual alginate+dextranase						Real weight of 20 ul CaCl2 in reaction (After encapsulation)					Actual alginate+dextranase
	Real weight of 20 ul sample				Real weight encapsulation from 100 ml preparing solution (After encapsulation); unit=g											Real weight of Alginate solution and Dextranase solution in CaCl2 solution (g)
Run	1	2	3	Avg							Run	1	2	3	Avg
4	0.0207	0.0228	0.0221	0.0218667	86.2						4	0.0213	0.0202	0.0211	0.0208667	20.1
12	0.0165	0.0172	0.0191	0.0176	81.79						12	0.0198	0.0209	0.02	0.0202333	20.5
3	0.028	0.02	0.0211	0.0230333	69.82						3	0.0208	0.0205	0.0197	0.0203333	22.1
5	0.0197	0.0205	0.0201	0.0201	83.76						5	0.0203	0.0208	0.0209	0.0206667	24.5
1	0.0213	0.0215	0.0203	0.0210333	82.57						1	0.02	0.02	0.0201	0.0200333	23.2
11	0.0204	0.0192	0.0199	0.0198333	72.66						11	0.02	0.0203	0.0202	0.0201667	25.1
2	0.0225	0.0225	0.0224	0.0224667	72.92						2	0.02	0.0201	0.0203	0.0201333	25.2
9	0.0205	0.0202	0.0205	0.0204	82.53						9	0.0218	0.0203	0.0219	0.0213333	22.2
10	0.0223	0.0199	0.0199	0.0207	73.84						10	0.0196	0.0199	0.0206	0.0200333	23.6
8	0.0227	0.0227	0.0225	0.0226333	78.89						8	0.0198	0.0202	0.0209	0.0203	20.1
7	0.0193	0.0211	0.0208	0.0204	77.25						7	0.0196	0.0206	0.0207	0.0203	19.3
6	0.021	0.0208	0.0213	0.0210333	68.92						6	0.02	0.0198	0.0202	0.02	28.4
