# Supplementary material for: Anti-Streptococcus mutans and anti-biofilm activities of dextranase and its encapsulation in alginate beads for application in toothpaste
Source: PeerJ journal article supplement (doi:10.7717/peerj.10165), 2020-11-17
Supplement: Dataset_S2.zip [file Dataset_S2.zip]

## Sheet: Standard curve
	Standard curve for dextranase activity
	maltose (mg/ml)
	Repeat	blank	0.1	0.2	0.3	0.4	0.5	1	1.5	2
	1	0.08	0.185	0.195	0.223	0.252	0.278	0.432	0.574	0.699
	2	0.076	0.168	0.192	0.221	0.249	0.285	0.433	0.559	0.692
	3	0.08	0.171	0.197	0.222	0.252	0.279	0.406	0.584	0.708
	Average (x)	0.0786667	0.174667	0.194667	0.222	0.251	0.280667	0.423667	0.572333	0.699667
	x-blank		0.096	0.116	0.143333	0.172333	0.202	0.345	0.493667	0.621
																			blank	0.1	0.2	0.3	0.4	0.5	1	1.5	2
																				Maltose concentration (mg/ml)
	Standard curve for Bradford assay (%EE)
	Albumin concentration (ug/ml)
	Repeat	500	250	125	62.5	31.25	15.125	blank
	1	1.121	0.949	0.712	0.575	0.463	0.407	0.365
	2	1.12	0.976	0.705	0.517	0.465	0.401	0.355
	3	1.142	0.955	0.723	0.569	0.457	0.409	0.325
	Average (x)	1.12767	0.96	0.713333	0.553667	0.461667	0.405667	0.312
	x-blank	0.788417	0.62075	0.374083	0.214417	0.122417	0.0664167	0.33925
																			blank	15.125	31.25	62.5	125	250	500
																				Albumin concentration (ug/ml)

## Sheet: The conditions
			The conditions			The responses
		Run	%Alginate	%CaCl2	Ph	Activity of Dextranase (Unit/g bead)	% Encapsulation efficacy (EE)
		1	0.85	15	6	8.39	40.02
		2	0.85	15	6	6.55	31.46
		3	0.7	20	6	5.08	24.62
		4	0.85	15	6	9.76	46.38
		5	0.7	10	6	1.71	8.95
		6	0.85	15	6	9.67	45.96
		7	0.85	10	7	15.57	73.4
		8	0.85	10	5	10.78	52.12
		9	0.7	15	5	6.86	33.91
		10	0.7	15	7	8.76	42.75
		11	1	10	6	6.68	33.91
		12	1	20	6	14.83	70.96
		13	1	15	7	6.76	33.45
		14	0.85	20	7	18.32	87.17
		15	0.85	20	5	15.52	74.23
		16	0.85	15	6	6.86	33.91
		17	1	15	5	16.83	80.27

## Sheet: %EE
		* % Encapsulation efficiency (%EE)
		𝐓𝐡𝐞 𝐚𝐦𝐨𝐮𝐧𝐭 𝐨𝐟 𝐩𝐫𝐨𝐭𝐞𝐢𝐧 𝐟𝐫𝐨𝐦 𝐞𝐧𝐜𝐚𝐩𝐬𝐮𝐥𝐚𝐭𝐢𝐨𝐧 (Before Encap)													𝐏𝐫𝐨𝐭𝐞𝐢𝐧 𝐜𝐨𝐧𝐭𝐞𝐧𝐭 𝐢𝐧 𝐜𝐚𝐥𝐜𝐢𝐮𝐦 𝐜𝐡𝐥𝐨𝐫𝐢𝐝𝐞 𝐬𝐨𝐥𝐮𝐭𝐢𝐨𝐧 (After Encap)
		The conditions				Alginate + Dextranase									CaCl2
		Run	%Alginate	%CaCl2	Ph	1	2	3	Avg	SD	Blank	Avg-blank			Box	1	2	3	Avg	SD	Blank	Avg-blank
		1	0.85	15	6	0.894	0.828	0.8043	0.8421	0.0464826	0.421533	0.420567			1	1.081	1.029	1.3	1.13667	0.14382	0.1829	0.953767
		2	0.85	15	6	0.6803	0.658	0.632	0.656767	0.0241736	0.405267	0.2515			2	0.849467	0.866833	0.839633	0.851978	0.0137728	0.177067	0.674911
		3	0.7	20	6	0.78	0.77	0.7584	0.769467	0.0108099	0.421533	0.347933			3	0.829133	0.885967	0.840533	0.851878	0.0300671	0.179933	0.671944
		4	0.85	15	6	0.7591	0.717	0.7907	0.7556	0.0369745	0.405267	0.350333			4	0.8759	0.7182	0.774667	0.789589	0.079902	0.177067	0.612522
		5	0.7	10	6	0.685167	0.6819	0.681067	0.682711	0.00216701	0.399833	0.282878			5	0.981233	0.9398	0.900133	0.940389	0.0405532	0.179933	0.760456
		6	0.85	15	6	0.797967	0.794667	0.7983	0.796978	0.00200841	0.405267	0.391711			6	0.798767	0.732867	0.790633	0.774089	0.0359304	0.1829	0.591189
		7	0.85	10	7	0.9262	0.989767	0.913633	0.9432	0.0408145	0.399833	0.543367			7	0.5701	0.570133	0.574033	0.571422	0.00226135	0.179933	0.391489
		8	0.85	10	5	0.748333	0.7465	0.749633	0.748156	0.00157421	0.399833	0.348322			8	0.802933	0.787233	0.764033	0.784733	0.0195701	0.1829	0.601833
		9	0.7	15	5	0.7636	0.7307	0.7552	0.749833	0.017094	0.421533	0.3283			9	0.777433	0.8282	0.734433	0.780022	0.0469369	0.177067	0.602956
		10	0.7	15	7	0.7089	0.710977	0.7102	0.710026	0.00104927	0.405267	0.304759			10	0.810267	0.710233	0.706233	0.742244	0.0589429	0.1829	0.559344
		11	1	10	6	0.693	0.659253	0.6674	0.673218	0.0176095	0.421533	0.251684			11	0.6734	0.764433	0.8252	0.754344	0.0764012	0.179933	0.574411
		12	1	20	6	0.917833	0.913867	0.912833	0.914844	0.00263951	0.399833	0.515011			12	0.537577	0.540733	0.5416	0.53997	0.0021175	0.177067	0.362903
		13	1	15	7	0.59565	0.585267	0.519767	0.566894	0.0411427	0.405267	0.161628			13	0.731433	0.7186	0.727633	0.725889	0.00659211	0.179933	0.545956
		14	0.85	20	7	0.98521	0.901033	0.932367	0.939537	0.0425439	0.405267	0.53427			14	0.520333	0.548367	0.534233	0.534311	0.0140168	0.179933	0.354378
		15	0.85	20	5	0.9089	0.911667	0.986833	0.9358	0.0442178	0.405267	0.530533			15	0.619033	0.617267	0.612667	0.616322	0.00328673	0.179933	0.436389
		16	0.85	15	6	0.769033	0.770641	0.769767	0.769814	0.000804692	0.421533	0.34828			16	0.977433	0.9282	0.934433	0.946689	0.0268073	0.179933	0.766756
		17	1	15	5	0.880167	0.8573	0.8769	0.871456	0.0123674	0.405267	0.466189			17	0.510237	0.529033	0.502033	0.513768	0.013842	0.179933	0.333834
		𝐓𝐡𝐞 𝐚𝐦𝐨𝐮𝐧𝐭 𝐨𝐟 𝐩𝐫𝐨𝐭𝐞𝐢𝐧 𝐟𝐫𝐨𝐦 𝐞𝐧𝐜𝐚𝐩𝐬𝐮𝐥𝐚𝐭𝐢𝐨𝐧											𝐏𝐫𝐨𝐭𝐞𝐢𝐧 𝐜𝐨𝐧𝐭𝐞𝐧𝐭 𝐢𝐧 𝐜𝐚𝐥𝐜𝐢𝐮𝐦 𝐜𝐡𝐥𝐨𝐫𝐢𝐝𝐞 𝐬𝐨𝐥𝐮𝐭𝐢𝐨𝐧
			y = 0.0023x + 0.054											y = 0.0023x + 0.054
			y=mx+c (ug/ml)	220 ul (sample+reagent) ; ug	ug/real weight	mg/real weight								y=mx+c (ug/ml)	220 ul (sample+reagent) ; ug	ug/real weight	mg/real weight			%EE	The results obtained from studies	The results obtained from predictions
		1	159.377	35.0629	138221	138.221							1	391.203	86.0646	82902.5	82.9025			1	40.0216	39.546
		2	85.8696	18.8913	87790.9	87.7909							2	269.961	59.3915	60174.3	60.1743			2	31.4573	39.546
		3	127.797	28.1154	85224.9	85.2249							3	268.671	59.1077	64243.3	64.2433			3	24.6191	26.795
		4	128.841	28.3449	118118	118.118							4	242.836	53.4239	63333.1	63.3331			4	46.3815	39.546
		5	99.5121	21.8927	85943.4	85.9434							5	307.155	67.574	78255.4	78.2554			5	8.94542	15.335
		6	146.831	32.3028	118342	118.342							6	233.56	51.3833	63953.1	63.9531			6	45.9592	39.546
		7	212.768	46.809	151928	151.928							7	146.734	32.2815	40405.4	40.4054			7	73.4049	62.27
		8	127.966	28.1526	113894	113.894							8	238.188	52.4014	54530.3	54.5303			8	52.1218	59.04
		9	119.261	26.2374	93592.7	93.5927							9	238.676	52.5088	61857.3	61.8573			9	33.908	20.605
		10	109.026	23.9856	83603.5	83.6035							10	219.715	48.3373	47861.1	47.8611			10	42.7523	47.495
		11	85.9498	18.9089	71603.7	71.6037							11	226.266	49.7785	47326.3	47.3263			11	33.9052	31.735
		12	200.44	44.0967	144492	144.492							12	134.306	29.5473	41957.1	41.9571			12	70.9623	64.575
		13	46.7947	10.2948	42758.2	42.7582							13	213.894	47.0566	28456.3	28.4563			13	33.4483	46.755
		14	208.813	45.9389	183156	183.156							14	130.599	28.7318	23495	23.495			14	87.1722	80.25
		15	207.188	45.5814	167449	167.449							15	166.256	36.5763	43145.9	43.1459			15	74.2335	85.36
		16	127.948	28.1485	107277	107.277							16	309.894	68.1766	70903.7	70.9037			16	33.9061	39.546
		17	179.213	39.4268	134568	134.568							17	121.667	26.7668	26556	26.556			17	80.2657	75.525
		The amount of protein from encapsulation											Protein content in calcium chloride solution
		Alginate solution + Dextranase solution (sample) = 20 uL in reaction (Before encapsulation)					Actual alginate+dextranase						Real weight of 20 ul CaCl2 in reaction (After encapsulation)					Actual alginate+dextranase
			Real weight of 20 ul sample				Real weight encapsulation from 100 ml preparing solution (After encapsulation); unit=g											Real weight of Alginate solution and Dextranase solution in CaCl2 solution (g)
		Box	1	2	3	Avg							Box	1	2	3	Avg
		1	0.0207	0.0228	0.0221	0.0218667	86.2						1	0.0213	0.0202	0.0211	0.0208667	20.1
		2	0.0165	0.0172	0.0191	0.0176	81.79						2	0.0198	0.0209	0.02	0.0202333	20.5
		3	0.028	0.02	0.0211	0.0230333	69.82						3	0.0208	0.0205	0.0197	0.0203333	22.1
		4	0.0197	0.0205	0.0201	0.0201	83.76						4	0.0203	0.0208	0.0209	0.0206667	24.5
		5	0.0213	0.0215	0.0203	0.0210333	82.57						5	0.02	0.02	0.0201	0.0200333	23.2
		6	0.0204	0.0192	0.0199	0.0198333	72.66						6	0.02	0.0203	0.0202	0.0201667	25.1
		7	0.0225	0.0225	0.0224	0.0224667	72.92						7	0.02	0.0201	0.0203	0.0201333	25.2
		8	0.0205	0.0202	0.0205	0.0204	82.53						8	0.0218	0.0203	0.0219	0.0213333	22.2
		9	0.0223	0.0199	0.0199	0.0207	73.84						9	0.0196	0.0199	0.0206	0.0200333	23.6
		10	0.0227	0.0227	0.0225	0.0226333	78.89						10	0.0198	0.0202	0.0209	0.0203	20.1
		11	0.0193	0.0211	0.0208	0.0204	77.25						11	0.0196	0.0206	0.0207	0.0203	19.3
		12	0.021	0.0208	0.0213	0.0210333	68.92						12	0.02	0.0198	0.0202	0.02	28.4
		13	0.0217	0.0203	0.0204	0.0208	86.39						13	0.0215	0.0202	0.0218	0.0211667	12.8
		14	0.0215	0.0198	0.0208	0.0207	82.53						14	0.0202	0.0205	0.0202	0.0203	16.6
		15	0.0197	0.0199	0.0207	0.0201	73.84						15	0.0198	0.0213	0.0207	0.0206	24.3
		16	0.0223	0.0199	0.0199	0.0207	78.89						16	0.02	0.0198	0.0202	0.02	20.8
		17	0.0227	0.0227	0.0225	0.0226333	77.25						17	0.0215	0.0202	0.0218	0.0211667	21

## Sheet: Dextranase activity
		The conditions				OD 540 nm
		Run	%Alginate	%CaCl2	Ph	1	2	3	Avg	SD	Avg-blank bead		Blank Bead	0.007	0.0085	0.01
		1	0.7	15	6	0.298	0.2998	0.304	0.3006	0.00307896	0.196267			0.102	0.12	0.139
		2	0.7	15	6	0.268	0.273	0.276	0.272333	0.00404145	0.168			0.102	0.124	0.136
		3	1	20	6	0.291	0.293	0.294	0.292667	0.00152753	0.149333			0.109	0.127	0.155
		4	0.85	15	6	0.3393	0.342	0.343	0.341433	0.00191398	0.217767		avg	0.104333	0.123667	0.143333
		5	1	10	6	0.2341	0.2303	0.231	0.2318	0.00202237	0.0884667		SD	0.00404145	0.00351188	0.0102144
		6	0.85	15	6	0.356	0.345	0.331	0.344	0.01253	0.220333
		7	0.85	10	7	0.439	0.445	0.449	0.444333	0.00503322	0.320667
		8	0.7	10	5	0.3241	0.3741	0.322	0.340067	0.0294924	0.235733
		9	0.85	15	5	0.3071	0.293	0.293	0.2977	0.00814064	0.174033
		10	0.7	15	7	0.3571	0.3232	0.322	0.3341	0.0199276	0.210433
		11	0.85	10	6	0.301	0.3045	0.29	0.2985	0.00756637	0.174833
		12	1	20	6	0.417	0.4201	0.471	0.436033	0.0303217	0.312367
		13	0.85	15	7	0.289	0.295	0.298	0.294	0.00458258	0.170333
		14	0.85	20	7	0.5108	0.493	0.492	0.4986	0.0105773	0.355267
		15	0.7	20	5	0.4175	0.419	0.429	0.421833	0.00625167	0.3175
		16	0.85	15	6	0.307	0.294	0.298	0.299667	0.00665833	0.176
		17	1	15	5	0.476	0.477	0.488	0.480333	0.00665833	0.337
				UNIT DEFINITION: One unit will liberate 1.0 µmole of maltose per minute at pH 6.0 at 37°C, using dextran as substrate.
		Run	y=mx+c	micro g	micro mol	micro mol/mins	125 ul (unit/g.bead)	unit/g.dried bead	Dilution factor	unit/g.dried bead	The results obtained from studies	The results obtained from predictions.
		1	0.475785	475.785	1.38997	0.0463322	0.827693	0.838594	10	8.38594	8.39079	2.20176
		2	0.37562	375.62	1.09734	0.0365781	0.594663	0.654626	10	6.54626	6.54949	2.20176
		3	0.309473	309.473	0.904099	0.0301366	0.495533	0.50751	10	5.0751	5.079	13.4825
		4	0.551973	551.973	1.61254	0.0537513	0.929229	0.975671	10	9.75671	9.75739	8.24601
		5	0.0937869	93.7869	0.27399	0.00913301	0.156677	0.170672	10	1.70672	1.7089	6.34
		6	0.561068	561.068	1.63911	0.054637	0.942126	0.966878	10	9.66878	9.66977	8.24601
		7	0.916608	916.608	2.67779	0.0892597	1.4943	1.55705	10	15.5705	15.57	13.0963
		8	0.615639	615.639	1.79854	0.0599512	1.04993	1.07763	10	10.7763	10.7793	4.40451
		9	0.397	397	1.1598	0.03866	0.655928	0.685687	10	6.85687	6.8631	13.083
		10	0.525986	525.986	1.53662	0.0512208	0.79665	0.875632	10	8.75632	8.7631	9.88626
		11	0.399835	399.835	1.16808	0.0389361	0.624709	0.686267	10	6.86267	6.8631	7.90675
		12	0.887196	887.196	2.59187	0.0863955	1.45929	1.48256	10	14.8256	14.831	13.4825
		13	0.383888	383.888	1.1215	0.0373832	0.659126	0.676096	10	6.76096	6.7631	12.938
		14	1.03922	1039.22	3.03598	0.101199	1.80116	1.83175	10	18.3175	18.3164	16.8538
		15	0.905386	905.386	2.64501	0.0881669	1.52904	1.55295	10	15.5295	15.5329	7.76202
		16	0.403969	403.969	1.18016	0.0393387	0.670279	0.68648	10	6.8648	6.8631	8.24601
		17	0.974486	974.486	2.84688	0.0948959	1.6026	1.68269	10	16.8269	16.8321	15.7037
		before Encap						after Encap
		Real weight of dextranase + alginate = 125 uL in reaction						Real weight of beads 1 g (wet & dried)
		Box	1	2	3	avg		Box	Bead (wet)	water	total	dried bead
		1	0.1133	0.1194	0.1166	0.116433		1	1.01	1.07	2.08	0.987
		2	0.1224	0.1231	0.1248	0.123433		2	1.01	0.9967	2.0067	0.9084
		3	0.1199	0.1199	0.1251	0.121633		3	1	1	2	0.9764
		4	0.1136	0.114	0.116	0.114533		4	0.98	1	1.98	0.9524
		5	0.1177	0.119	0.1148	0.117167		5	1.01	1	2.01	0.918
		6	0.1164	0.1154	0.1179	0.116567		6	1	1.01	2.01	0.9744
		7	0.1131	0.1198	0.1255	0.119467		7	0.99	1.01	2	0.9597
		8	0.1215	0.1174	0.1037	0.1142		8	1	1	2	0.9743
		9	0.1121	0.1147	0.1233	0.1167		9	0.98	1	1.98	0.9566
		10	0.134	0.1301	0.1236	0.129233		10	1.01	1	2.01	0.9098
		11	0.1296	0.1234	0.1247	0.1259		11	1.01	1.01	2.02	0.9103
		12	0.1246	0.1178	0.1146	0.119		12	1.01	1	2.01	0.9843
		13	0.1118	0.1178	0.1124	0.114		13	1	1.01	2.01	0.9749
		14	0.1125	0.1131	0.1132	0.112933		14	1.01	1	2.01	0.9833
		15	0.12	0.1133	0.1144	0.1159		15	1.01	1	2.01	0.9846
		16	0.120573	0.116818	0.114749	0.11738		16	1	1	2	0.9764
		17	0.120791	0.116602	0.114337	0.117243		17	0.98	1	1.98	0.9524
