# Supplementary material for: Anti-Streptococcus mutans and anti-biofilm activities of dextranase and its encapsulation in alginate beads for application in toothpaste
Source: PeerJ. 2020 Nov 17;8:e10165. doi: 10.7717/peerj.10165 (PMC7678491; doi:10.7717/peerj.10165)
Supplement: Supplemental Information 1 [file peerj-08-10165-s001.xlsx]

## Sheet: Sheet1
Table : Physicochemical properties of the stability of toothpaste
Physical property	Formulation 1		p-value	Formulation 2		p-value	Formulation 3		p-value
	T0	T3		T0	T3		T0	T3
Color	White	White		White	White		White	White
Odor	Peppermint	No		Peppermint	No		Peppermint	No
		change			change			change
Viscosity	1902.27	1895.6	0.0634	1801.27	1794.94	0.1132	1828.05	1644.11	0.0001*
[mPas]	±42.58	±7.23		±38.04	±39.31		±15.68	±16.50
Separation	No	No		No	No		No	No
	Separation	Separation		Separation	Separation		Separation	Separation
pH	6.54±0.01	6.55±0.01	0.2048	6.57±0.01	6.55±0.01	0.2952	6.52±0.02	6.51±0.01	0.7048
Notes: T0 = day 0, T3 = Storage product at 40±2 oC for 3 months
Formulations
1	Toothpaste base + 1% beads alginate
2	Toothpaste base + 2% beads alginate
3	Toothpaste base + 3% beads alginate
