# Supplementary material for: Anti-Streptococcus mutans and anti-biofilm activities of dextranase and its encapsulation in alginate beads for application in toothpaste
Source: PeerJ. 2020 Nov 17;8:e10165. doi: 10.7717/peerj.10165 (PMC7678491; doi:10.7717/peerj.10165)
Supplement: Supplemental Information 2 [file peerj-08-10165-s002.xlsx]

## Sheet: standard curve
			Maltose concentration (mg/ml)
	Repeat	blank	0.1	0.2	0.3	0.4	0.5	1	1.5	2
	1	0.079	0.174	0.19501	0.224	0.252	0.284	0.422	0.571	0.6992
	2	0.078	0.178	0.193	0.221	0.252	0.284	0.422	0.562	0.6923
	3	0.078	0.171	0.197	0.222	0.251	0.273	0.426	0.583	0.6465
	Average (x)	0.0783333	0.174333	0.195003	0.222333	0.251667	0.280333	0.423333	0.572	0.679333
	x-blank		0.096	0.11667	0.144	0.173333	0.202	0.345	0.493667	0.601

## Sheet: pH optimize 
	pH3	blank reaction	substrate + enz (SE)	substrate+buffer (SB)	enz+buffer (EB)			pH4	substrate + enz (SE)	substrate+buffer (SB)	enz+buffer (EB)			pH5	substrate + enz (SE)	substrate+buffer (SB)	enz+buffer (EB)			pH6	substrate + enz (SE)	substrate+buffer (SB)	enz+buffer (EB)			pH7	substrate + enz (SE)	substrate+buffer (SB)	enz+buffer (EB)
	Repeat	blank	SE	SB	EB			blank	SE	SB	EB			blank	SE	SB	EB			blank	SE	SB	EB			blank	SE	SB	EB
	1	0.087	0.393	0.088	0.088			0.085	0.449	0.095	0.095			0.082	0.591	0.093	0.113			0.101	0.654	0.095	0.095			0.101	0.624	0.095	0.095
	2	0.092	0.387	0.089	0.086			0.09	0.444	0.088	0.097			0.083	0.593	0.095	0.097			0.144	0.654	0.09	0.087			0.144	0.624	0.09	0.087
	3	0.089	0.398	0.087	0.085			0.085	0.451	0.089	0.093			0.088	0.597	0.091	0.099			0.102	0.6559	0.09	0.085			0.102	0.629	0.09	0.085
	Average (x)	0.0893333	0.392667	0.088	0.0863333			0.0866667	0.448	0.0906667	0.095			0.0843333	0.593667	0.093	0.103			0.115667	0.654633	0.0916667	0.089			0.115667	0.625667	0.0916667	0.089
	x-(blank+SE+SB+EB)		0.129						0.175667						0.313333						0.3583						0.329333
										enz 125 ul in reaction	enz conc. 200 mg/ml
	Dextranase commercial	pH	x-(blank+SE+SB+EB)	y=mx+c	micro g.	micro mol	micro mol/min; Unit	dilution factor	micro mol/min; Unit	Unit/ml	Unit/g enz
	(Unit/g. enz)	3	0.129	0.230769	230.769	0.674172	0.0224724	1000	22.4724	179.779	898.897
		4	0.175667	0.400899	400.899	1.17119	0.0390398	1000	39.0398	312.318	1561.59
		5	0.313333	0.902783	902.783	2.6374	0.0879134	1000	87.9134	703.307	3516.54
		6	0.3583	1.06672	1066.72	3.11632	0.103877	1000	103.877	831.018	4155.09
		7	0.329333	0.961113	961.113	2.80781	0.0935936	1000	93.5936	748.749	3743.75

## Sheet: Temp optimize
	Temp25	blank reaction	substrate + enz (SE)	substrate+buffer (SB)	enz+buffer (EB)			Temp 37						Temp 45						Temp 55
	Repeat	blank	SE	SB	EB			blank	SE	SB	EB			blank	SE	SB	EB			blank	SE	SB	EB
	1	0.087	0.633	0.088	0.088			0.085	0.649	0.095	0.095			0.082	0.621	0.093	0.113			0.101	0.434	0.095	0.095
	2	0.092	0.637	0.089	0.086			0.09	0.644	0.088	0.097			0.083	0.623	0.095	0.097			0.144	0.454	0.09	0.087
	3	0.089	0.638	0.087	0.085			0.085	0.651	0.089	0.093			0.088	0.627	0.091	0.099			0.102	0.419	0.09	0.085
	Average (x)	0.0893333	0.636	0.088	0.0863333			0.0866667	0.648	0.0906667	0.095			0.0843333	0.623667	0.093	0.103			0.115667	0.435667	0.0916667	0.089
	x-(blank+SE+SB+EB)		0.372333						0.375667						0.343333						0.139333
										enz 125 ul in reaction	enz conc. 200 mg/ml
	Dextranase commercial	Temp.	x-(blank+SE+SB+EB)	y=mx+c	micro g.	micro mol	micro mol/min; Unit	dilution factor	micro mol/min; Unit	Unit/ml	Unit/g enz
	(Unit/g. enz)	25	0.372333	1.11788	1117.88	3.26578	0.108859	1000	108.859	870.874	4354.37
		37	0.375667	1.13003	1130.03	3.30128	0.110043	1000	110.043	880.341	4401.71
		45	0.343333	1.01215	1012.15	2.95692	0.0985638	1000	98.5638	788.511	3942.55
		55	0.139333	0.268441	268.441	0.784227	0.0261409	1000	26.1409	209.127	1045.64
