# Supplementary material for: Anti-Streptococcus mutans and anti-biofilm activities of dextranase and its encapsulation in alginate beads for application in toothpaste
Source: PeerJ. 2020 Nov 17;8:e10165. doi: 10.7717/peerj.10165 (PMC7678491; doi:10.7717/peerj.10165)
Supplement: Supplemental Information 4 [file peerj-08-10165-s004.xlsx]

## Sheet: Anti-biofilm
	(OD570 nm)										(Adherent capability)
Treatment	0 hr					24 hr
	1	2	3	x	sd	1	2	3	x	sd
Uninoculated medium (negative control)	0.24	0.242	0.242	0.241333	0.0011547	0.24	0.241	0.241	0.240667	0.00057735	non-adherent
S. mutans (positive control)	0.242	0.241	0.253	0.245333	0.00665833	0.976	0.975	0.985	0.978667	0.00550757	strongly adherent
Commercial dextranase (1/2MIC)	0.241	0.24	0.241	0.240667	0.00057735	0.461	0.464	0.472	0.465667	0.00568624	weakly adherent
Uninoculated medium (negative control)
S. mutans (positive control)
Commercial dextranase (1/2MIC)
