# Supplementary material for: Anti-Streptococcus mutans and anti-biofilm activities of dextranase and its encapsulation in alginate beads for application in toothpaste
Source: PeerJ. 2020 Nov 17;8:e10165. doi: 10.7717/peerj.10165 (PMC7678491; doi:10.7717/peerj.10165)
Supplement: Supplemental Information 5 [file peerj-08-10165-s005.xlsx]

## Sheet: size of beads
Box-benhken	Diameter (mm)		mean (mm)
	Up-down	Left-Right
1	1.221	1.183	1.202
2	1.206	1.167	1.1865	1.1865
3	1.238	1.245	1.2415
4	1.16	1.247	1.2035
5	1.148	1.186	1.167	1.167
6	1.112	1.074	1.093
7	1.155	1.194	1.1745	1.1745
8	1.214	1.19	1.202	1.202
9	1.214	1.143	1.1785	1.1785
10	1.097	1.22	1.1585	1.1585
11	1.179	1.185	1.182	1.182
12	1.206	1.176	1.191	1.191
13	1.148	1.206	1.177	1.177
14	1.214	1.147	1.1805	1.1805
15	1.167	1.153	1.16	1.16
16	1.194	1.186	1.19	1.19
17	1.192	1.167	1.1795	1.1795
18	1.152	1.124	1.138	1.138
19	1.104	1.19	1.147	1.147
20	1.167	1.203	1.185	1.185
21	1.086	1.223	1.1545	1.1545
22	1.096	1.206	1.151	1.151
23	1.179	1.194	1.1865	1.1865
24	1.077	1.175	1.126
25	1.171	1.206	1.1885	1.1885
26	1.136	1.249	1.1925	1.1925
27	1.258	1.108	1.183	1.183
28	1.128	1.233	1.1805	1.1805
29	1.18	1.082	1.131	1.131
30	1.178	1.183	1.1805	1.1805
31	1.152	1.171	1.1615	1.1615
32	1.121	1.262	1.1915	1.1915
33	1.163	1.235	1.199	1.199
34	1.151	1.229	1.19	1.19
35	1.143	1.186	1.1645	1.1645
Mean			1.17479	1.17505
SD			0.0267904	0.0179229
