# Supplementary material for: Anti-Streptococcus mutans and anti-biofilm activities of dextranase and its encapsulation in alginate beads for application in toothpaste
Source: PeerJ. 2020 Nov 17;8:e10165. doi: 10.7717/peerj.10165 (PMC7678491; doi:10.7717/peerj.10165)
Supplement: Supplemental Information 7 [file peerj-08-10165-s007.xlsx]

## Sheet: dextranase toothpaste
dextranase toothpaste
VT Code	Name	Gender	Ages	Color	Odor	Flavor	Distribution	Homogeneity	Foaming	Cleannes	Freshness	Overall satisfaction.
1	นางสาว พรกมล คุณชัยประเสริฐ	FM	23	3	3	3	3	3	2	4	4	4
2	นาย จงรักษ์ ศึกรัมย์	M	43	4	4	4	4	4	4	3	4	4
3	นางสาว วัชรมาศ ม่วงแก้ว	FM	30	3	3	3	3	3	2	3	3	3
4	นางสาว จิรวรรณ ดาโฉม	FM	20	4	4	3	4	4	3	3	3	4
5	นางสาว ภัณฑิรา สิงห์คำ	FM	23	3	3	3	2	4	2	3	3	3
6	นางสาว พจมาน ผู้มีสัตย์	FM	41	3	2	2	2	2	1	3	3	2
7	นาย ธนาวุฒิ แสนมี	M	28	4	3	4	4	2	3	3	4	4
8	นาย อนุชา ทุมโนน้อย	M	50	4	4	4	4	4	4	4	4	4
9	นาง พิศวงษ์ ทุมโนน้อย	FM	54	3	4	3	3	3	4	4	3	3
10	นาย นัทธี ยมหา	M	61	4	4	4	4	4	3	4	4	4
11	นางสาว พัชรินทร์ อีคะละ	FM	27	3	3	3	3	3	3	4	3	3
12	นางสาว อลิษา ยืนยั่ง	FM	26	3	3	3	4	3	4	4	4	3
13	นางสาว พิมพ์ชนก ทุมโนน้อย	FM	21	3	3	3	3	3	4	4	4	3
14	นาง เบญจวรรณ ผาสุก	FM	45	2	2	2	2	3	3	3	3	3
15	นาย นิสิต ผาสุก	M	46	3	2	3	3	3	4	3	3	2
	sum			49	47	47	48	48	46	52	52	49
	average		35.8667	3.26667	3.13333	3.13333	3.2	3.2	3.06667	3.46667	3.46667	3.26667
	%			65.3333	62.6667	62.6667	64	64	61.3333	69.3333	69.3333	65.3333
		Male (persons)	5
		Female (persons)	10

## Sheet:  Ideal toothpaste
Ideal toothpaste
VT Code	Name	Gender	Ages	Color	Odor	Flavor	Distribution	Homogeneity	Foaming	Cleannes	Freshness	Overall satisfaction.
1	นางสาว พรกมล คุณชัยประเสริฐ	FM	23	3	4	4	3	3	4	4	4	4
2	นาย จงรักษ์ ศึกรัมย์	M	43	4	4	4	4	4	4	3	4	4
3	นางสาว วัชรมาศ ม่วงแก้ว	FM	30	3	3	3	3	3	4	4	4	3
4	นางสาว จิรวรรณ ดาโฉม	FM	20	4	4	4	4	4	3	4	3	4
5	นางสาว ภัณฑิรา สิงห์คำ	FM	23	4	3	3	4	4	2	3	4	4
6	นางสาว พจมาน ผู้มีสัตย์	FM	41	3	4	4	4	4	4	4	3	4
7	นาย ธนาวุฒิ แสนมี	M	28	4	4	4	4	4	3	3	4	4
8	นาย อนุชา ทุมโนน้อย	M	50	4	4	4	4	4	4	4	4	4
9	นาง พิศวงษ์ ทุมโนน้อย	FM	54	3	4	3	3	3	4	4	3	4
10	นาย นัทธี ยมหา	M	61	4	4	4	4	4	3	4	4	4
11	นางสาว พัชรินทร์ อีคะละ	FM	27	3	3	4	3	3	4	4	3	3
12	นางสาว อลิษา ยืนยั่ง	FM	26	4	4	3	4	3	4	4	4	4
13	นางสาว พิมพ์ชนก ทุมโนน้อย	FM	21	3	3	3	3	3	4	4	4	3
14	นาง เบญจวรรณ ผาสุก	FM	45	4	4	4	4	4	3	4	3	4
15	นาย นิสิต ผาสุก	M	46	4	4	4	3	4	4	4	4	4
	sum			54	56	55	54	54	54	57	55	57
	average			3.6	3.73333	3.66667	3.6	3.6	3.6	3.8	3.66667	3.8
	%			72	74.6667	73.3333	72	72	72	76	73.3333	76

## Sheet: Merge graph
Formulation	Color	Odor	Flavor	Distribution	Homogeneity	Foaming	Cleannes	Freshness	Overall satisfaction
Ideal toothpaste	3.6	3.73333	3.66667	3.6	3.6	3.6	3.8	3.66667	3.8
dextranase toothpaste	3.26667	3.13333	3.13333	3.2	3.2	3.06667	3.46667	3.46667	3.26667
